# Supplementary material
Source: publisher figshare collection journal article supplement (https://gsajournals.figshare.com/ndownloader/files/26568473)
Supplement: Supplementary file 1 [file 26568473]

## Sheet: File_S1
File description
This file contains the raw F2 phenotype data trait means. The first column "id" indicates the name assignment for the specific F2 plant. Values in each row indicates the specific F2 plant's mean trait value for the particular trait. Blank cells indicate that no phenotype mean could be obtained for the particular trait of the specified F2 plant.
id	DTM	LWC_g	PLHT_cm	TSM_g	STEM_DIAMETER_cm	STEM_BIOMASS_g	SEED_YIELD_g	TOTAL_DRY_BIOMASS_g	CBC (%)	THCA (%)	CBDA (%)	CBGA (%)	3.carene (ppm)	A.pinene (ppm)	A.terpinene (ppm)	B.caryophyllene (ppm)	Camphene (ppm)	Caryophyllene.Oxide (ppm)	Citronellol (ppm)	Eucalyptol (ppm)	Geraniol (ppm)	G.terpinene (ppm)	Linalool (ppm)	Linalyl.Acetate (ppm)	Ocimene.1 (ppm)
UC-1
UC-3	91.6667	0.446667	50.4	12.8	0.6	4.91	7.00667	34.38
UC-5	94	1.06	100	16.4	1.4	32.34	46.22	157.34	0	0.0003	0.0088	0.0004
UC-6	98	0.8	91.6	18	1.1	29.98	77.91	191.5	0	0	0.002	0.5499	0	19.18	1.82	12.89	0.32	1.8	0	0	0	0.88	0	0	0.56
UC-8	96	0.8	121.9	14	1.1	23.42	23.84	87.42	0	0.0015	0.0602	0.0006	0	100.36	0	48.84	0	8.67	0	7.22	0	3.49	0	0	0
UC-9	103.667	0.656667	70.3	12.2	0.7	11.5567	4.78333	56.6633
UC-11	97.6667	0.37	102.233	13.8	0.833333	23.25	18.3733	185.85	0	0	0.0009	0.0036	0	19.32	0	1.14	0.45	9.38	0.5	0	2.32	0	0	0	0
UC-12	110	1.31	85.9	13.8	0.75	17.03	16.27	95.32	0	0.0034	0.116	0	0	73.32	4.31	31.49	2.14	7.36	0	0	2.77	2.28	0	2.05	4.17
UC-14	87.3333	1.13		13.2	1	14.0133	24.0133	83.7533	0	0	0.1963	0	0	57.47	4.11	49.04	0	9.13	0	0	0	3.79	0	0	2.05
UC-16	101.333	0.8	98.2667	16	1	23.7267	47.9833	136.37	0	0.0033	0.1189	0.0041	0	116.36	4.79	47.88	0	14.24	0	0	0	5.32	0	0	4.92
UC-18	94	1.02	69.6	12.8	0.6	6.64	11.12	38.06
UC-19	105	1.39	99.1	16.8	1.1	29.21	58.35	161.43	0.0004	0.0007	0.0414	0.0007	0	81.32	3.26	23.9	2	35.12	0	0	0	2.47	2.76	0	2.72
UC-20	98	0.61	65.4	17.8	0.8	12.04	26.03	71.41	0	0.0003	0.0092	0.0005	0	64.55	0	2.42	0.92	21.21	3.93	0	5.46	0	1.45	2.98	0
UC-21	105	0.806667	68.8667	15.8	0.866667	15.9167	3.90333	94.9533	0.0008	0.0053	0.1979	0.0026	0	126.18	4.26	38.56	1.91	4.95	0	0	0	2.95	0	0	0
UC-24	112	1.50667	92.0333	15.4	1	24.3733	28.7	97.0267	0	0.0009	0.0404	0	0	102.72	1.22	27.47	1.9	18.6	0	3.3	2.85	2.6	0	0	0
UC-26	98	0.36	40.7	11.8	0.5	4.8	8.6	37.38	0	0.0014	0.053	0.0006
UC-27	84	0.403333		17.2	0.883333	14.3667	13.0367	68.98	0	0.0073	0.2827	0.0119	0	86.97	5.68	56.41	1.4	11.25	0	0	0	5.1	0	2.21	3.11
UC-28	107	1.09	155.1	15.4	2	96.38	65.95	320.85	0.0022	0.0216	0.5945	0.0282	0	62.66	2.64	22.64	1.8	5.62	0	3.69	0	1.79	0	2.46	1.97
UC-29	98	1.44	158	11.8	1.3	52.45	62.24	245.19	0.0011	0.0062	0.2177	0.0035	1.52	88.37	5.31	88.74	1.13	13.42	0	0	0	3.53	0	2.57	4.75
UC-30	98	1.28	73.6	15.4	1.1	29.21	9.55	131.24	0	0	0.0017	0.0008
UC-31	85.6667	0.606667		13.8	0.65	2.73	1.42333	21.2033	0	0.005	0.1856	0.0009	0	51.38	3.92	14.36	0	14.96	0	0	0	6.19	0	0	0
UC-32	94	0.71	103.6	17.2	1	28.11	62.26	164.39	0	0	0.0015	0.0006	0	31.93	0	4.11	0.69	36.31	1.78	1.45	4.71	0	0	1.78	0
UC-33	94	1.04	50	12.6	0.8	6.48	5.44	41.18	0	0.0015	0.0694	0.0009	0	31.61	0	19.87	0	9.73	0	3.08	0	0	0	0	0
UC-34	107	2.22	117.1	14.2	1.3	28.88	52.17	158.29	0	0	0.7806	0	0	99.41	4.18	32.74	3.94	10.22	0	0	0	3.45	0	3.93	0
UC-35	86	1.04	70.5	13.8	0.6	5.84	10.84	42.41	0	0.0062	0.2339	0.0056	0	210.35	6.43	56.33	0	28.71	0	11.8	0	6.69	4.85	0	0
UC-37	110	1.15	69.8	14.6	0.9	11.84	11.94	47.25	0	0.0073	0.2818	0.0105	5.8	247.52	4.66	13.37	8.03	16.33	0	21.41	0	6.67	0	0	0
UC-38	94	1.65	91.6	4.6	0.9	13.01	0.31	44.67
UC-41	110	3.18	160.1	13.8	1.7	88.83	58.48		0	0	0.724	0.0933	0	353.48	9.88	44.57	10.21	5.51	0	0	0	9.52	0	0	7.75
UC-43	96	0.38	40.6	11.5909	0.45	2.56	0.54	11.9	0.0009	0.0021	0.0741	0.002	0	59.87	2.16	49.32	1.36	7.81	0	2.01	0	1.54	0	1.95	0
UC-44	105	1.7	121.3	15.4	1.1	22.06	30.83	49.19	0	0.0004	0.0211	0.0203	0	22.39	0	13.98	0	28.74	0	0	0	0	0	0	0
UC-46	105	0.45	47	15.6	0.5	2.91	3.9	13.84	0.0018	0.0268	0.6996	0.029	8.4	242.55	9.73	42.9	8.52	2.09	0	9.53	0	8.92	0	4.82	8.14
UC-48		0.7	60.7	60.7
UC-49	96	0.57	51.7	13.6	0.6	5.75	4.2	24.78	0.0005	0	0.002	0.0725	0	96.15	0	182.24	0	33.28	0	0	0	0	0	0	0
UC-50	107	1.02	67	16	0.9	15.13	13.51	105.26	0	0	0.0016	0.0004	0	5.48	0.34	0	0	3.38	0	0	1.76	0	0	0	0
UC-51	101	1.34	94.6	17.6	1.1	15.4	34.04	89.29	0	0	0.0054	0.3591	0	13.57	0	2.68	0	2.11	0	1.09	0	0	1.29	2.52	0.35
UC-52	82	0.33		9.4	0.5	3.36	1.82	14.13
UC-53	84	0.3		9.41176	0.4	0.96	0.44	6.29
UC-56	107	2.93	163.1	11.6	1.3	52.65	53.34	199.07	0	0	0.001	0.0004	0	17.95	0	2.12	0	6.94	0	0	4.49	0	0	0	0
UC-57	101	0.61	66.7	14	0.55	5.79	7.61	29.7
UC-58	101	1.51	109.8	17.6	1.1	46.01	62.93	171.64	0	0	0.0019	0.0008	0	14.18	0	1.68	0	11.7	0	0	2.74	0	0	1.54	0
UC-60	91	0.62	134.4	15.6	1.4	58.45	42.1	200.45
UC-61	107	2.02	136.9	17.4	1.4	30.4	11.2	98.85	0	0.0115	0.3408	0.0231	5.79	175.86	3.67	9.65	6.84	3.6	0	4.36	0	3.79	0	9.1	0
UC-62	105	1.08	103.9	14.6	1	21.96	28.72	115.38	0	0.0022	0.0678	0	0	43.22	1.26	28.58	1.08	11.37	0	3.64	1.95	1.56	0	0	1.67
UC-63	107	1.42	94.8	14	0.9	19.14	30.27	108.91
UC-64	84	0.8		13.2	0.6	8.46	5.98	42.62	0.0009	0.002	0.0719	0.012	1.65	133.94	2.71	56.37	1.82	7.66	0	3.2	0	1.92	1.94	2.18	0
UC-67	91	1.89	150	11.4	1.2	28.53	46.22	133.99	0	0.008	0.2588	0.0025	4.67	291.06	16.65	62.06	9.02	114.63	14.38	17.9	7.62	11.4	23.75	4.42	5.44
UC-68	96	1.23	113.2	14.2	1.5	42.24	15.23	162.63	0	0.0005	0.0226	0.0003	0	41.08	0	15.91	0	24.99	1.1	0	0	0	0	2.26	0.85
UC-69	110	3.07	102.6	12.2	1.9	26.97	8.09	79.2
UC-70	101	2.26	110.7	20	1.4	3.46	47.12	149.62	0	0	0.0019	0.0249	0.78	61.54	2.13	16	1.14	17.15	0	7.22	2.09	1.75	0	0	0.9
UC-72	91	1.31	95.5	12	1.1	19.6	1.52	48.24	0.0014	0	0.0106	0.0806	0	101.05	4.03	86.19	1.42	13.97	0	0	0	3.6	0	0	3.2
UC-73	94	0.01	23	11.4	0.4	1.36	2.02	11.69	0	0	0.0014	0	0	22.36	0	4.53	0	22.04	0	0	6.74	0	0	0	0
UC-74	82	0.37		10.6	0.6	2.73	0.76	20.39	0	0	0.002	0.0002	0	35.36	0	0	0.78	11.57	4.19	0	8.72	0	0.46	2.03	0
UC-75	92	0.63	61.5667	13.2	0.7	13.4767	17.07	71.49
UC-76	84	0.64		11.0526	0.5	4.2	0.33	16.93	0.0009	0.013	0.373	0.019	0	45.13	0	41.28	0	2.28	0	0	0	1.72	0	0	0
UC-77	94	0.76	82.4	82.4
UC-78	107	1.98	158.5	16	1.7	71.4	102.95	309.33	0	0.003	0.1254	0.0121	0	73.07	3.92	24.46	0	27.76	0	0	0	0	0	0	0
UC-79	117	1.13	91.5	14	1.4	42.9	31	234.94
UC-80	98	1.14	152.4	15.8	1.2	42.34	49.65	170.2	0	0.0123	0.3789	0.0211	4.11	95.2	3.29	3.37	2.87	3.89	0	3.83	0	3	1.49	3.84	0
UC-82	105	2.4	117	14	1	21.74	27.94	88.01	0.0005	0.003	0.1201	0.0016	0	105.17	5.1	59.22	1.9	21.65	1.95	0	4.58	4.56	2.87	1.64	7.97
UC-85	92.5	1.17	96	18.4	1.05	14.525	30.855	83.3	0	0.0035	0.1115	0.0049	1.25	136.87	5.16	51.25	2.06	10.96	0	8.38	0	3.66	0	2.94	6.88
UC-86	105	1.1	165.2	13.8	1.6	105.54	73.56	332.12	0	0	0.0004	0.0001	0	28.81	0	0	0	23.1	6.04	0	12.98	0	0	1.81	0
UC-88	86	0.74	121.8	15.2	1	23.06	36.06	101.54	0.0034	0.0267	0.7352	0.0503	1.25	113.54	3.73	58.57	3.04	11.87	0	7.53	0	3.24	1.73	5.26	4.4
UC-89	105	0.98	98.6	13.4	1.2	32.4	51.77	176.6	0	0	0	0.2217	0	26.51	0	0	0	4.29	0	0	0	0	0	0	0
UC-90	107	2.8	112.9	12.4	1.1	15.94	8.32	82.94	0	0.0173	0.6022	0.0063	12.11	259.36	8.04	105.9	11.46	38.91	0	17.18	0	8.23	0	0	0
UC-91	98	2.62	126.2	13.2	1.3	33.5	69.38	215.06	0	0	0.0037	0.0012	0	57.21	0	2.85	0	25.76	11.84	0	21.21	0	8.18	0	0
UC-92	95.5	1.36		16	0.85	8.085	6.915	51.615	0	0.0045	0.1595	0.0025	0	88.12	0	67.08	0	20.25	0	4.8	0	0	0	0	0
UC-95	105	2.16	127.6	22.8	1.8	39.58	20.42	126.37	0	0.0196	0.4638	0.03	1.38	72.99	2.67	22.46	2.49	4.29	0	4.8	0	2.26	0.67	4.22	3.5
UC-97	107	0.84	155	14	1.4	55.24	45.94	221.09	0	0.0013	0.0461	0.0076	0	41.46	0	10.42	1.19	19.35	0	0	3.86	0	0	0	0.73
UC-98	96	0.49	36.6	3	0.5	3.08	0.22	20.54	0	0	0.0015	0	0	14.65	0	1.35	0.51	16.3	0	0	4.17	0	0	1.63	0
UC-99	107	1.78	89.6	10.6	2.4	42.03	7.2	130.97	0.0006	0.0574	1.8897	0.0677	22.35	677.66	25.48	75.25	20.91	14.46	0	22.42	0	22.6	5.38	10.24	8.67
UC-100	107	0.81	98.8	18.2	1.2	49.1	40.75	240.08	0	0.0008	0.0253	0.0493	0	29.68	1.56	27.03	0.56	6.28	0	2.19	1.24	1.22	0	1.55	0
UC-101	105	0.47	46.1	12.6	0.8	7.9	9.98	39.21	0	0	1.1135	0
UC-102	95.6667	0.563333		13	0.466667	5.03333	1.68667	27.2667
UC-103	117	1.38	82.1	12.6	1	17.83	7.4	72.17	0	0	0.005	0.0205	0	28.7	0	11.36	0	16.07	0	0	0	0	0	2.71	0
UC-104	117	1.13	81.4	15.8	1.1	19.9	10.51	82.27	0	0	0.0021	0.0005	0	23.56	0.45	1.14	0.65	7.45	0	0.78	0	0	0	2.35	0
UC-105	105	1.03	97.2	16.6	0.95	22.82	25.54	128.04	0.0008	0.0011	0.05	0.012	0	55.22	1.31	108.98	0	7.89	0	0	0	1.1	0	0	1.16
UC-106	101	0.44	37.2	14.4	0.6	3.61	6.77	25.74	0	0	0.0018	0.0002
UC-107	96	1.07	47.6	1.2	0.7	7.47	0.09	38.81
UC-108	96	1.33	76	17.8	0.6	7.67	5.41	47.98	0.0012	0.0054	0.2402	0.0044	0	99.31	2.52	61.79	1.82	13.92	0	0	0	2.31	0	2.48	4.88
UC-109	107	1.775	133.75	18.2	1.3	40.16	36.865	169.015	0	0.0007	0.0264	0.0072	0	30.23	0	30.16	0	11.9	0	0	0	0	0	0	0
UC-110	110.667	1.62667	92.9	18.2	1	29.2033	18.2067	91.5467
UC-111	101	1.03	92.1	12.6	1.3	51.22	55.91	201.12	0	0	0.0027	0.2177	0	14.51	0	8.74	0	3.6	0	0	0	0	0	0	0
UC-112		1.15
UC-114	92	0.35	41.2	12	0.7	5.63	7.5	40.44	0.0005	0.0012	0.0542	0.0009
UC-116	100	1.50667	127.867	14.6	1.13333	27.5267	41.91	148.053	0.0002	0.0016	0.0614	0.0006	0	10.06	0	17.85	0	7.39	0	0	0	0	0	2.1	1.06
UC-118	94	0.56	67.7	12.6	0.9	11.85	22.46	70.23	0	0.0002	0.0057	0.0004	0	23.5	1.16	2.8	0.55	12.51	7.09	0	6.07	0	0	3.78	0
UC-119	107	1.53	109	14.6	1.2	22.09	9.66	62.7	0	0.0013	0.0626	0.0007	0	185.2	0	33.93	3.56	23.27	0	0	9.02	0	4.51	0	0
UC-120	106.333	0.803333	76.2333	14.6	1.1	25.3767	44.7967	138.35	0	0.0003	0.0211	0.0008	0	52.17	0	14.58	0	39.72	0	0	0	0	0	0	0
UC-121	110.333	2.00667	139.767	13.2	1.48333	52.4467	38.98	180.007
UC-122	101	1.02	80.7	13	0.9	9.37	16.64	53.19	0	0.0028	0.1074	0.0008	0	51.51	2.07	21.03	1.34	3.1	0	2.21	0	1.36	0	1.93	2.25
UC-123	93.5	0.57	71.9	11.8	0.8	12.905	6.34	61.185	0	0	0.026	0.0025	0	101.4	0	55.54	2.01	5.75	0	0.62	0	0.57	0	2.65	0
UC-124	86	0.61	62.1	14.6	0.7	5.79	9.98	38.28	0	0.0024	0.0994	0.0011	0	59.99	0	23.82	0	9.33	0	0	0	0	0	0	0
UC-126	89.6667	0.533333	89.6	15.4	0.65	8.38333	3.99333	40.6133	0.0003	0.0014	0.0534	0.0005	0	48.92	1.75	46.99	0.92	17.42	0	0	2.08	1.02	0	1.68	2.59
UC-127	105	1.78	91.4	18.2	0.7	10.91	10.88	51.26
UC-128	103	0.83	55.9	16.2	1.3	9.8	6.235	53.38	0.0019	0.06	1.6715	0.1012	0	407.39	17.01	51.44	17	4.12	0	13.4	0	15.45	0	0	0
UC-129	103.667	1.27333	90.8667	13.8	1.13333	22.16	31.66	106.663	0	0.0025	0.0836	0.0033	1.79	100.65	5.29	32.72	1.55	8.18	0	1.87	0	3.03	1.88	2.21	0
UC-130	103.333	1.07	91.2333	10.8	1.33333	25.91	25.8267	152.777	0	0.0007	0.0317	0.0002	0	41.76	0	27.91	0	16.9	0	0	0	0	0	0	0
UC-131	88	0.32	36.8	12	0.5	2.16	5.17	18.26	0.0006	0.0012	0.0628	0.0007	0	35.93	0.84	33.54	0.51	8.16	0	0	0	1.54	0	2.89	1.38
UC-132	107	1.93	128.4	15.6	1.1	32.88	19.94	132.46	0	0	0.0036	0.003	0	17.68	0	0	0.89	11.12	2.47	0	8.98	0	0	3.38	0
UC-133	107	0.87	89.1	12.8	0.9	19.5	14.53	77.96	0	0.0005	0.0187	0.0013	0	24.57	0	9.71	0.45	28.62	0	0	0	0	0	2.35	0
UC-134	107	1.41	76.9	14.8	1.2	27.27	31.18	135.66	0	0	0.0029	0.0156	0	9.34	0	4.14	0	4.37	0	0	0	0	0	0	0
UC-135	96	0.98	101.7	16.8	1	25.97	66.29	173.98
UC-136	100.333	5.86	61.1	14.8	0.6	4.75	15.6033	43.9433	0.0036	0.0436	1.2675	0.1021
UC-137	105	0.77	128.6	13.2	1.7	91.63	74.85	273.57
UC-139	107	1.74	79.7	14.2	0.7	19.54	39.19	143.36
UC-140	94	1.26	79.4	15	1	12.72		75.65
UC-141	103.667	1.08667	122.467	16.2	1.13333	50.6267	49.2733	206.107	0	0.0006	0.0216	0.0035	0	28.64	0	17.16	0	7.01	0	0	0	0	0	2.02	0
UC-143	96	1.26	85.1	18	0.9	15.43	39.01	97.07	0	0	0.0019	0.4207	0	11.72	0	12.28	0	11.02	0	3.22	0	0	0	0	0
UC-144	96	0.74	80.7	12.4	0.8	9.76	17.28	59.08	0	0.0006	0.031	0.0009	0	36.48	0	22.88	0	19.51	0	0	0	0	0	0	0
UC-145	96	0.75	65.1	14	0.9	12.14	12.51	63.22	0	0.0013	0.0495	0.002	0.51	78.74	1.6	21.11	1.37	6.84	0	3.04	0	1.48	0	0	0
UC-147	107	2.64	145.4	15.8	1.2	66.95	38.86	242.56	0	0.0013	0.044	0.0004	0	76.18	0	14.14	0	11.15	0	0	0	0	0	0	0
UC-149	117	0.97	48.5	12.8	1	20.77	13.06	72.92
UC-151	112.333	2.11667	92.5	19	1.43333	17.49	5.78	67.7867	0.0015	0.0101	0.3099	0	0	377.9	14.46	251.46	5.44	2.42	0	0	0	8.49	0	0	7.93
UC-152	107.5	0.475	61.2	11.6	1.3	13.435	5.06	50.405	0	0	0.0021	0.0145	0	44.58	0	7.54	0	14.28	0	0	0	0	0	0	0
UC-153	107	0.4	16.9	13	0.3	1.32	2.48	16.96	0	0	0.0007	0	0	20.56	0	6.55	0.52	15.1	0	0	3.29	0	0	1.8	0
UC-154	89	0.905	59.5	11.8	0.7	4.825	2.89	30.775	0.0008	0.0024	0.1026	0.001
UC-155	95.3333	0.806667	104.5	16.6	1.06667	23.3933	57.2567	135.15	0.0004	0.0021	0.0896	0.001	0	69.19	2.32	54.97	1.28	11.49	0	0	0	1.31	0.43	0	3.94
UC-156	98	0.45	50.4	15.4	0.5	3.84	10.2	28.55	0	0.0042	0.1363	0.0052	0.73	59.08	1.37	11.48	2.36	2.87	0	0	0	1.19	0	2.76	0.91
UC-157	84	0.78		12.8	0.7	5.15	5.51	42.93	0	0.0132	0.5028	0.0077	2.49	204.38	4.17	37.29	6.93	9.5	0	9.6	0	0	0	0	0
UC-158	120	1.30333	118.767	18	1.46667	40.47	22.7833	171.037	0	0	0.0022	0	0	20.94	0	1.48	0.42	15.96	1.95	0	5.5	0	0	2.32	0
UC-159	106.333	0.656667	78.5333	14.2	1.03333	24.66	9.99	125.54	0	0	0.0008	0.0005	0	3.7	0	0	0	3.81	0	0	2.09	0	0	1.1	0
UC-162	84	0.89		12.2	0.7	4.4	3.49	30.2	0.0005	0.0024	0.1049	0.0013	0	35.02	2.53	19.75	0	3.76	0	0	0	2.13	0	3.24	0.84
UC-164	117	0.33	33.1	9.2	0.6	5.81	8.3	31.03
UC-165	82	0.5		13.4	0.6	6.81	3.21	27.45	0	0.0032	0.1431	0.0043	0	58.58	5.4	13.16	0	12.6	0	0	0	4.46	0	0	0
UC-168	96	0.43	46.5	11.8	0.4	2.15	1.16	11.5	0	0	0.0013	0.0006	0	7.73	0	3.06	0	12.06	0	0	4.02	0	0	1.79	0
UC-169	107	0.56	115	14.4	1.7	28.1	57.13	181.75
UC-171	105	1.78	139.6	11.6	1.7	98.89	83.42	327.73	0	0.0405	1.3003	0.0345	0	252.05	3.82	129.36	6.23	3.13	0	0	0	4.25	0	3.02	4.48
UC-172	82	0.54		14.6	6	4.96	3.02	25.64
UC-174	107	0.53	78	12.8	2.68	23.39	31.64	115.15
UC-177	91	0.41	41	13.6	0.4	2.44	4.55	17.46	0	0.0003	0.0067	0.0006	0	9.7	0	0	0	13.02	1.78	0	5.85	0	0	2.17	0
UC-178	101	1.42	106.4	17	1	23.6	49.62	151.93	0	0	0.001	0.0002	0	21.45	0	0	0.57	10.62	1.58	0	4.3	0	0	1.58	0
UC-179	98	0.37	43.5	10.8	0.5	2.74	1	19.02	0	0	0.0019	0.0085	0	25	0	6.91	0	13.8	0	3.1	0	0	0	2.07	0
UC-183	101	0.67	50	11	0.5	6.33	12.54	40.32	0	0	0.0052	0.0268	0	21.26	0	10.33	0	12.84	0	0	0	0	0	0	0
UC-184	84	0.5		6.36364	0.4	1.49	0.13	8.75	0	0	0.0941	0	0	19.17	0	5.8	0	0	0	0	0	0	0	0	0
UC-185	105	1.34	117.1	13.2	1.3	41.24	33.65	169.09	0.002	0.0172	0.6376	0.0274	0	96.76	4.13	18.64	3.81	5.93	0	0	0	3.25	0	3.3	3.64
UC-187	88	0.66	66.3	14.4	0.8	10.28	13.51	62.27
UC-188	102.667	2.23667	118.067	19.8	1.13333	35.7733	1.77	135.357
UC-189
UC-190	98	0.53	61.9	12.8	0.6	6.02	12.35	36.79	0	0.0404	1.2814	0.1268	0	165.67	7.51	35.24	4.49	4.87	0	0	0	5.02	0	4.18	4.48
UC-192	98	0.52	78.1	15.2	1.3	33.89	34.66	175.55	0	0	0.0077	0.0162	0	17.63	0	5.32	0.35	3.52	0	0	0	0.71	0	0	0
UC-193	99.6667	0.42	74.9667	11.4	0.833333	16.09	18.5967	100.257	0.0003	0.0016	0.0596	0.0041	0	74.08	1.98	34.02	1.4	8.4	0	0	0	1.89	0	0	1.98
UC-194	91	1.22	81.8	18	1.1	21.26	21.02	96.92	0.0007	0.0019	0.0797	0.0014	0	55.6	1.01	56.24	0.69	7.68	0	0	0	0.48	0	2.72	1.6
UC-195	105.667	0.906667	113.933	14.2	1.13333	38.2333	14.07	109
UC-196	88	0.66	53.6	13.2	0.6	5.77	0.72	35.07	0	0.0011	0.039	0	0	19.9	0.69	19.52	0	5.99	0	1.21	0	0.51	0	1.75	0.46
UC-199	88	0.41	28.4	8.93617	0.5	1.55	0.43	10.49	0	0	0.0012	0.0038	0	24.67	0	0.53	0.57	13.88	0	0	5.47	0	0	1.26	0
UC-200	107	1.67	104.7	12.8	1.25	29.66	26.43	118.78	0	0.0193	0.6267	0.011	6.96	174.8	8.95	74.57	4.37	6.51	0	2.87	0	8.74	0	0	3.33
UC-201	105	1.56	110.5	14.8	2.2	37.89	44.36	82.25
UC-204	84	0.38		9	0.4	2.31	1.6	18.36	0.0018	0.0175	0.5993	0.0512	0	32.41	3.61	11.49	1.52	4.58	0	0	3.69	2.44	0	3.32	0.87
UC-205	101	1.6	72.6	17.2	0.8	6.93	18.28	48.53
UC-206	105	1.38	127	13	1.6	70.54	62.12	315.09	0	0	0.0098	0.0005	0	57.19	0	0	1.34	28.94	4.68	0	11.84	0	0	0	0
UC-207	82	0.41		7.8	0.4	1.67	0.49	10.27
UC-208	96	0.18	39	11.9355	0.5	1.7	0.38	9.31	0	0	0.002	0.0008	0	19.34	0.49	1.16	0.46	12.24	3	0	4.56	0	0	2.03	0
UC-209	99	0.606667	57.6667	14.8	0.8	11.97	11.8033	66.3933	0	0.0019	0.0745	0.0012	0	119.95	5.25	29.69	2.18	8.48	0	0	0	3.01	0	0	2.34
UC-210	105	2.47	141	18.6	2.1	92.82	92.08	334.38	0	0.0237	0.6318	0	10.78	519.37	7.3	45.42	14.27	10.25	0	10.63	0	8.09	8.29	9.61	1.23
UC-211	94	0.44	70.7	16.6	0.5	8.86	21.26	51.37	0	0	0.0021	0.0004	0	103.04	0	6.44	1.98	65.12	11.97	0	19.56	0	0	4.82	0
UC-212	105	1.18	107.5	14.4	1.2	33.35	14.26	151.95	0	0.0004	0.0167	0.0016	0	29.62	0.83	4.24	0.6	3.13	0	0	0	0.92	0	0	0.73
UC-213	94	0.6	78.2	17.4	0.8	8.59	17.85	48.12	0	0	0.0024	0	0	19.4	0	2.75	0.33	21.62	0	1.5	3.41	0	0.57	2.24	0
UC-214	96.3333	1.14	106.2	13.2	0.933333	20.5067	30.28	109.857	0	0	0.0016	0.0003	0	50.96	0	3.24	1.23	15.04	7.56	0	12.94	0	2.2	0	0
UC-215	101	1	110.6	11.6	1.2	37.33	35.48	156.59	0	0.009	0.2703	0.0261	8.6	218.45	5.97	12.8	7.88	5.6	0	10.05	0	6.19	3.3	4.73	4.73
UC-223					0.9	14.74	9.7	62.68
UC-227	96	0.73	67.9	13.6	0.9	10.71	9.89	51.46	0.0007	0.0033	0.1484	0.0048	0	62.89	2.1	41.28	1.27	2.53	0	0	0	1.75	0	0	0
UC-229	82	0.44	36.9	7.4	0.4	2.19	1.56	20.25	0.0006	0.0024	0.0799	0.0015	0	97.78	2.83	66.64	3.08	0.53	0	0	0	2.84	0	0	0
UC-235	94	0.68	57.4	16.8	1.2	7.58	3.48	42.06	0	0	0.0004	0.0406	0	46.19	0	10.29	0	11.38	0	0	0	0	0	0	0
UC-237	98	0.6	62.1	11.4	0.6	6.23	8.23	36.62
UC-238	98	0.88	177.9	13.2	2	139.25	21.52	304.81	0	0	0.0115	0.0005	0	20.73	0	1.12	0.64	25.64	0	0	7.54	0	0	0	0
UC-239	101	1.3	86.6	86.6
UC-240	105	3.18	97.8	16	1	12.19	8.67	66.7	0	0	0.0023	0.0007	0	5.83	2.02	0	8.44	0.74	0	0	1.85	0.99	0.42	5.19	0
UC-244	84	0.42		8	0.6	2.78	0.07	24.96
UC-245	119	1.4	85.6	9.8	0.9	37.89	31.6	134.15	0	0.0007	0.0232	0.001	0	6.82	0.92	0	0	3.61	0	0	3.28	0	0	2.31	0
UC-247	99	0.716667	86.0333	12.8	0.9	22.95	24.2367	87.7067	0.0026	0.0415	1.0583	0.045	1.63	202.95	5.76	23.81	8.68	3.69	0	8.37	0	4.18	4.14	4.46	0
UC-248	114.667	0.623333	97.2	12.4	1.16667	49.3333	30.5467	161.76	0	0	0.0007	0.0002	0	21.99	0	0	0	0	0	0	2.66	0	0	0	0
UC-249	91	0.64	61.4	13	0.5	7.27	4.86	34.12	0	0	0.1014	0	0	182.85	7.49	87.92	2.9	12.5	0	10.11	0	5.66	0	0	6.38
UC-250	98	0.25	22.2	10.7143	0.2	1.15	0.4	10.81	0	0.0036	0.1226	0.0037	0	67.58	0	23.59	0	8.03	0	0	0	0	0	0	0
UC-251	107	1.29	85.8	20.2	1.2	15.65	7.78	77.22	0	0	0.0016	0	0	12.27	0	1.62	0.31	8.77	0	0	4.5	0	0	0	0
UC-252	105	1.31	150.1	11.6	1.3	44.73	64.47	187.74	0	0	0.0027	0.0012	0	10.14	0	7.07	0.2	18.71	0	0	3.18	0	0	2.34	0
UC-253	98	1.34333	82.2	20.4	0.9	13.3	57.1	92.51	0	0.002	0.0779	0.0017	0	972.55	51.12	546.11	16.31	99.28	0	0	0	47.14	0	0	41.23
UC-255	101	1.6	151.8	16.6	1.4	63.97	32.93	176.8	0	0.0008	0.0276	0.0003	0	36.02	0	14.91	0	8.86	0	0	0	0	0	3.7	0
UC-256	101.5	0.815	52.4	14.6	0.75	7.805	15.38	51.8
UC-257	105	0.62	96.6	15	1.2	38.54	73.57	214.91	0.0005	0.0014	0.0573	0.0024	0	40.76	2.42	30.91	0.78	8.38	0	0	0	2.34	0	0	1
UC-258	101	0.81	114.5	31.6		55.47	78.89	225.9
UC-262	84	0.44	42	13	0.6	2.9	0.87	15.8	0	0	0.0038	0	0	46.88	0	4.52	1.29	43.22	3.26	1.35	6.31	0	0.7	0	0
UC-263	105	0.76	81.7	15	1.4	22.64	24.05	93.38	0	0	0.0042	0.001
UC-264	101	1.8	169.6	18.2	1.3	50.18	48.22	200.83
UC-265	105	0.57	77.3	14.2	0.9	23.08	30.36	133.37	0	0	0.0043	0.0141	0	47.02	0.84	12.3	0.81	19.28	0	0	0	0.93	0	0	0
UC-266	107	0.65	68.8	14.4	0.8	7.16	11.36	32.13	0.0002	0.0035	0.1441	0.0018	0	78.38	0	46.82	0	15.95	0	3.27	0	0	0	0	0
UC-268	107	0.59	55.6	17.2	0.9	15.9	9.16	77.35
UC-269	105	0.88	72.7	13.8	0.7	11.12	7.2	36.48	0	0	0.0017	0.0202	0	33.64	1	23.72	0.71	5.84	0	5.45	0	1.05	0	2.36	0
UC-270	106.333	1.06667	82.6667	14.4	1.03333	25.8833	14.5833	102.873	0	0	0.0049	0.29	0	30.6	1.51	6.52	0.98	3.6	0	0	0	1.16	0	3.25	0
UC-271	119	1.05	55.3	10.4444	0.9	15.9	0.52	79.15
UC-272	98	0.67	51.4	17.8	0.8	10.17	25.06	69.86	0.0006	0.0037	0.1231	0.0054	0.95	133.38	1.42	66.02	2.68	39.41	0	5.26	0	2.46	1.23	3.04	2.8
UC-274	107	0.64	79.2	11.8	1.1	51.97	55.88	219.08	0	0.0007	0.031	0.0003	0	68.72	0	20.94	0	3.76	0	0	0	0	0	0	0
UC-276	101	1.9	113.4	11.4	0.8	7.5	0.65	10.24
UC-277	110	0.52	78.6	18.4	0.9	20.79	55.79	151.78
UC-278	105	0.4	46.5	12.4	0.8	85.58	1.72	120.46	0.0002	0.0008	0.0277	0.0004	0	15.21	0	10.04	0	9.33	0	0	0	0	0	1.09	0
UC-282	105	1.13	87.6	15.4	1	16.61	1.73	69.94	0	0	0.0004	0	0	9.95	0	5.17	0	27.54	0	0	0	0	0	0	0
UC-283	96	3.13	148.1	11.8	1.4	52.12	37.52	158.33	0	0	0.0073	0.0369	0	30.67	1.77	15.98	0.71	19.89	0	10.43	2.47	1.77	0	3.24	1.38
UC-288	99	0.916667	69.8667	14.4	0.866667	15.2533	14.0567	78.89
UC-289	110	2.32	130	14.4	1.1	45.91	3.63	136.86	0	0	0.006	0.0216	0	94.28	0	20.7	3.84	3.07	0	0	0	0	0	0	0
UC-295	86.3333	0.386667	50.6	13.8	0.566667	4.48	10.2467	40.1133	0.005	0.0223	0.8911	0.0463	0	159.96	8.08	90.25	4.92	25.08	0	5.49	0	5.35	0	4.46	0
UC-300	107	1.06	69	12.8	0.7	8.49	3.72	47.02	0	0	0.004	0.0008	0	15.85	0	0	0	11.72	0	0	0	0	0	0	0
UC-301	97.3333	1.61	108.2	19	1.01667	30.2467	74.2267	169.95	0.0004	0.0006	0.0372	0.0006	0	139.27	1.44	27.22	3.46	52.9	4.96	0	5.91	1.81	3.62	2.67	2.35
UC-302	101	0.81	116.2	17	1	22.84	53.3	128.53
UC-303	86	0.59	58.6	10.6	0.6	3.66	5.42	30.65	0	0.0085	0.2947	0.0034	0	173.71	5.04	130.69	0	7.15	0	0	0	4.46	4.83	0	7.59
UC-304	84	0.54		10	0.45	2.36	0.09	8.73	0	0	0.0019	0.0006	0	31.26	0	0	0	27.94	14.85	0	19.92	0	0	0	0
UC-306	105	0.82	57.6	16.6	0.8	17.13	34.63	110.5
UC-308	107	2.35	117.9	13.8	1.55	64.77	8.27	201.01	0	0	0	0.0264	0	42.89	0	24.6	0	20.1	0	0	0	0	0	0	0
UC-310	86	0.65	86.7	16	0.9	12.26	25.34	83.79	0	0.0123	0.4031	0	3.46	276.23	7.96	216.66	3.68	21.64	0	9.48	0	5.82	0	2.7	12.05
UC-312	105	1.48	163	14.4	1.8	142.03	141.58	452.05	0	0.0003	0.0105	0.371	0	128.9	2.94	6.44	4.04	7.26	0	0	0	2.66	0	0	0.92
UC-313	96.5	0.87	62.7	14.4	0.7	8.955	7.27	51.485
UC-314	98	0.7	115.1	15.4	1.1	21.02	53.98	127.65	0	0	0.0266	0	0	112.56	2.2	8.19	3.33	47.4	5.81	0	8.39	1.95	6.48	0	2.51
UC-315	107	1.19	112.5	12.4	1.5	22.59	10.83	74.85	0	0	0.002	0.0018	0	2.6	0	0.41	0	4.36	0	0	1.52	0	0	2.11	0
UC-316	89	0.78	50	10.2	0.775	14.135	1.195	46.18
UC-319	105	0.76	119.3	14.6	1.3	52.06	46.8	165.9	0.0009	0.0077	0.2634	0.0153	0	141.26	2.13	19.5	4.81	5.6	0	0	0	2.62	0	0	0.49
UC-320	98.6667	0.573333	58.1333	16.8	0.8	12.08	23.78	84.79	0	0.0006	0.0262	0.0005	0	43.86	2.04	28.03	0.55	9.06	0	0	0	1.87	0	0	1.94
UC-321	107.333	1.17333	80.8	14.2	1.1	24.5967	22.2467	130.827
UC-322	110	0.86	112.4	13	1.3	64.29	55.09	209.65
UC-323	94	0.92	65.2	14.2	1.2	20.69	29.05	100.48	0	0.0393	1.0243	0	0	106.12	7.08	16.1	3.51	5.2	0	16.61	0	5.74	0	3.95	0
UC-324	107	0.68	95.1	15.4	1.1	26.23	40.33	139.9	0	0.0005	0.0246	0	0	31.93	3.95	5.6	0	7.9	0	0	0	0	0	0	0
UC-327	107	0.55	59.1	11.6	0.7	9.48	4.53	41.24	0	0.0011	0.0374	0	0	41.16	0	22.87	0.7	9.22	0	0.72	0	0	0	0	2.44
UC-328	105	0.36	47.5	6.6	0.5	3.52	7.15	27.76
UC-329	101	0.83	110.5	14.4	0.95	33.36	36.99	124.57	0	0.0006	0.0225	0.0008
UC-330	107	1.97	111.5	14.8	1.3	54.5	55.43	213.79	0	0	0.0041	0.0269	0	47.51	1.4	17.46	1.23	21.96	0	0	0	1.06	1.25	2.41	1.47
UC-331	94	1.39	121.4	13.4	1.2	48.3	58.99	208.57	0.001	0.0173	0.5232	0.03	0	51.89	3.76	15.54	2.51	3.85	0	0	0	2.56	0	3.09	0
UC-335	91	0.51	46.1	11.8	0.5	2.97	5.59	16.72	0	0	0.0063	0.0003	0	46.55	0	4.72	0.99	32.23	3.34	0	7.06	0	0	0	0
UC-336	107	1.23	65.8	16.4	0.9	21.1	7.69	98.36
UC-337	102	1.17	110.467	14.4	1.13333	26.3433	31.24	107.05
UC-338	94	1.32	77.4	13.8	0.8	9.94	4.31	47.9	0	0	0.1069	0	0	40.69	0	33.07	0	7.88	0	0	0	0	0	0	0
UC-340	86	1.46	90.6	12.8	1.5	24.38	23.36	112.26
UC-344	94	0.83	61.3333	21.4	0.7	6.45333	15.6933	42.1867	0	0.0004	0.0128	0.0008	0	37.34	0	3.04	0.61	17.64	1.92	0	3.37	0	0	2.15	0
UC-347	98	1.9	161	10.4	1.7	84.65	70.08	254.68	0	0.0025	0.1048	0.0019	0	60.47	0	60.94	0	19.81	0	4.27	0	0	0	0	0
UC-348	119	0.83	164.7	14.6	1.7	79.76	3.41	211.31
UC-349	107	2.04	140.4	12.8	1.7	81.3	31.83	275.11	0	0.0009	0.0389	0.0055	0	70.15	0	14.9	0	19.16	0	0	0	0	0	0	0
UC-351		1.05	74.6	18.6	0.8	9.65	6.48	40.28	0	0	0.0012	0	0	30.5	0	1.43	0.58	17.38	3.24	0	5.43	0	0.7	1.56	0
UC-354	86	0.62	59.8	9.2	0.8	9.45	6.62	50.49
UC-355	117	2.3	113.2	19.4	1	15.04	11.76	58.3	0	0.0127	0.3498	0	4.53	263.67	9.9	170.22	4.92	31.23	0	12.4	0	7.61	0	3.11	8.06
UC-357	96	0.46	37.3	9.4	0.5	2.57	1.08	19.19
UC-359	105	0.64	169.5	13	1.6	75.12	45.51	252.41	0	0.0005	0.0218	0	0	21.45	0	15.43	0	7.27	0	0	0	0	0	0	0
UC-360	86	0.31	35.5	9	0.4	1.28	1.29	10.62	0	0.0006	0.0248	0.0018	0	45.01	0.91	2.19	1.01	35.49	7.5	0	11.84	0	2.63	0	0
UC-362	94	1.08	116.8	11.4	1.3	33.23	54.63	179.47	0.0014	0.0102	0.3511	0.0113	0	153.27	7.31	86.36	2.76	12.1	0	0	0	5.8	0	1.81	3.25
UC-363	98	0.89	110.8	17.6	0.9	19.91	21.64	95.58	0	0	0	0.0365	0	36.01	1.68	38.92	0.63	13.97	0	10.23	0	1.67	0.57	2.65	0.75
UC-365	105	0.82	89.5	13.2	1.2	39.4	34.84	126.29	0	0.0008	0.04	0.0009	0	135.91	2.5	15.76	3.02	11.57	0	0	0	2.14	1.05	0	3.52
UC-371	105	0.31	49.6	17.4	0.6	0.81	11.01	37.35
UC-374	101	1.09	124.3	17.6	0.9	29.82	16.35	103	0	0.0004	0.0172	0.0012	0	44.13	0.53	16.79	0.72	17.31	0	2.3	0	0	0	2.38	0.79
UC-375	95.6667	0.916667	104.167	13.2	1.23333	35.8833	41.7333	151.673
UC-384	101	0.59	91	19.4	0.9	14.88	39.56	108.43	0	0.0009	0.0293	0.0013	0.54	39.76	2.05	35.39	0.73	9.57	0	5.62	3.71	1.87	0	2.07	1.79
UC-387	101.333	2.22667	120.2	16	1.1	29.7133	15.1033	127.897	0	0	0.0015	0.0002	0	4.09	0	0	0	6.76	0	0	2.25	0	0	1.2	0
UC-389	105	1.46	79.7	12.6	1.2	38.35	23.84	131.66	0	0.0019	0.0783	0.0014	0	239.66	3.27	106.12	3.38	14.21	0	5.08	0	3.02	0	0	0
UC-390	117	0.95	100	16.4	1.4	59.13	60.59	216.07	0	0.0117	0.3725	0.0068	4.47	119.57	4.96	19.68	2.5	4.66	0	0	0	4.9	0	0	4.24
UC-391	94	1.27	60.2	15.8	1.3	10.11	12.67	65.05
UC-392	91	0.42	55.1	11.4	0.7	4.27	4.97	18.43	0.0022	0.026	0.6919	0.0616	1.53	122.1	4.45	72.78	2.9	5.31	0	8.77	0	3.07	2.28	3.37	3.26
UC-394	117	1.37	80.2	15.2	0.8		1.73	27.38	0	0	0.0037	0	0	7.55	0	0	0	8.17	0	0	2.78	0	0	2.15	0
UC-399	88	0.45	51.8	12.4	0.6	4.97	4.24	22.32	0	0	0.0024	0.04	0	44.63	0	16.6	0	1.25	0	0	0	0	0	0	0
UC-401	84	0.56		9.2	0.4	2.21	0.87	8.83
UC-404	110	1.91	190.5	15.6	1.15	41.495	23.315	126.16	0	0	0.7101	0	0	166.26	5.75	44.28	7.04	5.14	0	0	0	4.97	1.99	0	5.21
UC-406	96	0.94	88	15.6	0.9	10.68	28.6	72.39
UC-407	84	0.29		10.2	0.4	1.83	1.18	11.24	0.0003	0.0007	0.0298	0.0015	0	39.89	0	11.62	1.13	15.28	0	0	0	0	1.97	2.57	0
UC-413	98	1.52	130.6	15	1.2	38.07	25.08	123.84	0	0.0125	0.3752	0.0435	0	95.42	0	17.76	4.09	5.68	0	7.15	0	4.25	0	0	0
UC-414	107	1.27	83.6	14.2	1.1	31.14	22.95	133.8
UC-415	110	1.28	115.8	14	1.5	72.38	36.42	208.66
UC-417	94	0.78	58.1	16	1	6.95	10.02	30.17	0.0003	0	0.0022	0.1342	0	88.31	5.81	67.54	0	9.52	0	6.33	0	4.87	0	0	0
UC-419	96	0.92	34.2	8.8	0.5	6.86	1.01	18.92	0.0019	0.0049	0.1764	0.0261	0	98.49	0	88.84	0	7.01	0	9.36	0	2.44	0	0	2.72
UC-421	101	0.63	91.4	14.8	0.7	16.07	35.43	100.66	0	0.0012	0.0403	0	0.46	46.58	2.54	39.53	0.66	11.26	0	3.74	0	1.92	0	2.31	2.27
UC-422	101	0.55	35.1	12.4	0.5	2.36	6.52	17.9
UC-423	107	1.3	105.8	15	1.1	26.38	24.1	92.88	0.0017	0.0217	0.6122	0.0298	0	64.59	1.59	20.87	2.58	7.3	0	0	0	1.07	0	2.64	0
UC-424	101	3.49	169.8	18	2.2	63.07	45.56	179.02	0	0	0.003	0.0223	0	42.7	0	36	0	29.18	0	13.94	0	0	0	0	0
UC-428	107	0.8	71.8	12	0.6	6.05	11.26	36.45
UC-431	107	2.27	157	13.4	1.2	42.08	15.23	130.32	0	0.0015	0.0472	0.0005	0	40.89	0	15.09	0	17.88	0	0	0	0	0	0	0
UC-432	94	1.5	76.4	13.8	1.2	24.8	55.99	163.6	0	0.0002	0.0156	0.3879	0	25.76	0	14.05	0	6.68	0	8.13	0	0	0	0	0
UC-436	110	0.58	68	13.6	0.9	23.76	8.7	166.06
UC-437	96.6667	1.09333	101.233	14	0.8	16.1633	34.3433	96.5933	0	0.0008	0.0285	0	0	25.23	1.79	13.97	0.41	16.92	0	0	1	0	0.43	3.11	1.58
UC-442	96	1.58	59	13.6	0.8	10.22	13.11	71.59
UC-444	117	1.2	68.5	11	0.9	9.93	2.1	51.94	0	0	0	0.1418	0	84.84	0	88.3	0	15.82	0	5.09	0	2.86	0	0	0
UC-446		0.32	45.2	45.2	0.35	1.74		3.94	0.0004	0	0.0013	0.0426	0	33.08	0	28.34	0	4.1	0	4.38	0	0	0	0	0
UC-450	101	3.54	105.1	15.6	1.2	22.34	29.84	120.94	0	0.017	0.4858	0.0208	0	125.4	7.94	34.44	5.27	4.63	0	26.75	0	9.53	0	0	0
UC-452	101	1.44	133	19	1.3	51.49	57.63	217.88	0	0	0.0049	0.0491	0	106.01	3.23	66.5	2.2	11.17	0	17.19	0	3.35	0	0.97	0
UC-455	88.6667	0.64		10	0.6	3.64	2.79	39.1	0.002	0.0095	0.3944	0.0181	0	42.38	1.68	6.27	1.06	2.82	0	0	0	1.73	0	2.25	0.15
UC-458	119	1.1	104.1	13.2	2.1	17.14	7.49	123.42	0	0.0006	0.0267	0.0005	0	134.37	0	14.04	7.59	12.73	10.05	0	22.74	0	6.74	0	0
UC-459	101	0.77	80.5	15	0.8	12.1	38.11	100.16	0	0.0018	0.0721	0.0004	0	33.38	0	19.06	0	33.1	0	0	0	0	0	0	0
UC-460	82	1.23		16.6	0.7	5.73	3.55	39.49	0.0028	0.0346	1.2213	0.1022	0	76.24	6.19	39.27	0	6.08	0	7.54	0	6.22	1.92	0	0
UC-465	101	1.63	82	15.4	0.9	11.8	10.53	59.97	0	0.0112	0.3501	0.0296	0	178.45	5.57	3.31	8.34	0	0	0	0	5.14	0	3.23	1.42
UC-467	97.6667	2.03333	141.6	17.8	1.03333	16.8767	22.6767	80.3367	0	0.0031	0.1464	0.0033	0	179.48	2.87	47.73	3.56	33.22	2.5	0	0	2.81	0	4.21	2.8
UC-468	84	0.96		11.2	0.6	4.27	4.3	29.1
UC-469			30.1	10.6	0.2	0.57	0.69	2.54	0.0003	0.0006	0.0329	0.0006	0	35.81	2.36	42.49	0.78	5.93	0	0	0	1.42	0	0	3.12
UC-470	96	2.25	159	17.2	1.4	46.1	18.87	151.28	0	0.0042	0.1407	0.0032	0	99.2	7.63	55.39	1.2	24.89	0	5.76	0	5.26	0	0	4.74
UC-471	102	1.15667	89.1333	14.4	0.966667	22.8533	61.6767	67.45	0	0	0.006	0.0005	0	19.99	0	0	0	5.42	0	0	0	0	0	0	0
UC-472	91	0.48		14.7368	0.7	4.07	0.28	21.35	0	0.0002	0.0056	0.0005
UC-473	93.5	0.53	45.95	12.6	0.55	5.34	4.22	26.895
UC-489	105.667	0.526667	65.2	14.2	0.9	23.42	35.1967	126.117	0	0	0.0027	0.0091	0	25.71	0	0	0	32.32	0	0	0	0	0	0	0
UC-490	105	0.43	61.4	12.8	0.75	12.75	17.87	53.25	0	0	0.0244	0	0.45	208.94	1.09	73.85	4.34	16.26	0	6.43	0	1.52	0	0	0
UC-491	94	2.28	121.2	16.4	1.3	40.72	94.77	237.3	0	0.0021	0.0866	0.0008	0	67.34	3.64	61.73	1.25	7.16	0	0	0	3.08	0	1.89	4.29
UC-493	105	0.73	73.2	14.8	1.1	30.29	41.78	152.6	0	0.0011	0.0378	0.0009	0	42.93	1.68	13.58	1	10.76	0	0.74	0	1.25	0	1.4	0
UC-495	107	1.31	119.6	16.8	1.3	37.32	2.27	155.95	0	0	0.1319	0	2.6	108.77	4.42	50.59	0	8.55	0	3.98	0	2.23	0	0	0
UC-497	105	1.81	156	16.8	1.6	72.39	42.7	238.5
UC-500	102.5	1.215	121.4	14.8	1.15	31.51	9.69	162.735
UC-507	119	0.65	107.8	11.2	1.3	40.54	9.5	162.77	0	0	0.0024	0.0003	0	27.9	0	0	0	7.35	0	0	0	0	0	0	0
UC-509
UC-511	119	1.34	135.7	12.8	1.5	34.56	3.35	81.55	0	0.0015	0.0623	0.0022	0	108.79	0	58.15	0	15.12	0	0	0	0	0	0	0
UC-512
UC-514	107	0.53	35.4	10.8163	0.4	3.32	0.61	26.38	0	0	0.0002	0	0	12.92	0	3.13	0	4.63	0	0	3.2	0	0	0	0
UC-518	96	1.05	47.2	9.2	0.6	6.21	1.2	23.96	0	0	0.3471	0	0	83.16	0	107.44	0	10.86	0	0	0	0	0	0	0
UC-526	105	1.84	99.1	11	0.9	15.61	3.92	79.28	0	0	0.0009	0	0	15.75	0	5.14	0	6.91	0	0	0	0	0	0	0
UC-527	91	0.76	96.6	12.4	1	15.8	35.81	102.03	0	0	0.0828	0	0	47.62	0	18.83	0	4.21	0	0	0	0	0	0	0
UC-529		1.52	147.6	15.2	1.1	43.53	40.38	159.24	0	0.0007	0.0295	0.0003	0	53.31	0	16.01	0	20.02	0	0	0	0	0	0	0
UC-533	101	2.58	134.5	19.2	1.1	32.51	61.58	155.07	0	0	0.0024	0.0002	0	32.28	0	2.01	0	8.82	0	0	0	0	0	0	0
